# Supplementary material for: Integration of the Unfolded Protein and Oxidative Stress Responses through SKN-1/Nrf
Source: PubMed Central journal article supplement (PMC3772064; doi:10.1371/journal.pgen.1003701), 2013-09-12
Supplement: pgen.1003701.s008.pdf [file pgen.1003701.s008.pdf]

**Table S1.**

| <b><u>ER Stress and ER homeostasis</u></b> |                                                                                               |                                  |
|--------------------------------------------|-----------------------------------------------------------------------------------------------|----------------------------------|
| <b><u>Gene ID</u></b>                      | <b><u>Function</u></b>                                                                        | <b><u>SKN-1 target study</u></b> |
| <i>abu-8</i>                               | alternative unfolded protein response [51]                                                    | this study                       |
| <i>abu-11</i>                              | alternative unfolded protein response [51]                                                    | this study                       |
| <i>acl-4</i>                               | Phospholipid biosynthesis gene, ER stress upregulated [8]                                     | ChIP [34]                        |
| <i>arf-1.1</i>                             | GTP-binding ADP-ribosylation factor, ER stress upregulated [51]                               | ChIP [34]                        |
| <i>atf-5</i>                               | ER and oxidative stress transcription factor ATF4 [8,15]                                      | ChIP [34], microarray [21]       |
| <i>atf-6</i>                               | ER transcription factor [8]                                                                   | ChIP [34]                        |
| <i>B0348.2</i>                             | LPS-induced tumor necrosis factor alpha factor, integral to membrane [8]                      | microarray [21]                  |
| <i>C47E12.3</i>                            | putative EDEM factor (ERAD) [8]                                                               | ChIP (operon) [34]               |
| <i>cdc-48.2</i>                            | ERAD ATPase, p97 [8]                                                                          | ChIP [34]                        |
| <i>cdr-4</i>                               | membrane bound gst, ER stress upregulated [8,51]                                              | ChIP [34]                        |
| <i>cebp-2</i>                              | C48E7.11, putative C/EBP $\beta$ , ER stress regulated [81]                                   | ChIP [34]                        |
| <i>cept-1</i>                              | PtdCho synthesis, ER membrane integrity [80,88]                                               | ChIP [34]                        |
| <i>cka-1</i>                               | PtdCho synthesis, ER membrane integrity [80,88]                                               | ChIP [34]                        |
| <i>ckb-4</i>                               | PtdCho synthesis, up with ER stress [8] and oxidative [21], ER membrane integrity [80,88]     | ChIP [34], microarray [21]       |
| <i>cnb-1</i>                               | calcineurin, UPR [64], interacts with PERK [65], not predicted to increase with ER stress [8] | ChIP [34]                        |
| <i>crt-1</i>                               | calreticulin, mataintenance of ER [66], up with ER stress (this study)                        | ChIP [34]                        |
| <i>dnj-28</i>                              | ER chaperone, regulated with ER stress [8]                                                    | ChIP [34]                        |
| <i>E04D5.1</i>                             | putative eIF2 $\alpha$ (Wormbase), PERK phosphorylation target during ER stress [89]          | ChIP [34]                        |
| <i>erd-2</i>                               | putative ER lumen protein retaining receptor similar to yeast <i>erd2</i> [67]                | ChIP [34], microarray [21]       |
| <i>ero-1</i>                               | ER oxidoreductase, upregulated with ER stress [8,15]                                          | ChIP [34]                        |
| <i>F41B4.3</i>                             | Membrane bound, ER stress upregulated [51]                                                    | ChIP [34]                        |
| <i>F42G8.8</i>                             | putative serine/threonine specific PP1 [68] (by homology, Wormbase)                           | microarray [21]                  |
| <i>F47A4.5</i>                             | Phospholipase, ER stress upregulated [8]                                                      | ChIP [34]                        |

|                  |                                                                                                    |                    |
|------------------|----------------------------------------------------------------------------------------------------|--------------------|
| <i>F55E10.6</i>  | putative corticosteroid beta-dehydrogenase (by homology, Wormbase), most likely resides in ER [82] | microarray [21]    |
| <i>fzo-1</i>     | Mito/ER connector (Mfn1/Mfn2) essential for mitochondrial-associated membrane (MAM) formation [70] | ChIP [34]          |
| <i>hsp-16.11</i> | chaperone, ER stress upregulated [51]                                                              | ChIP [34]          |
| <i>hsp-16.2</i>  | chaperone, ER stress upregulated [51]                                                              | ChIP [34]          |
| <i>hsp-16.41</i> | chaperone, ER stress upregulated [51]                                                              | ChIP [34]          |
| <i>hsp-3</i>     | ER chaperone, BiP homolog, upregulated with ER stress [8,51]                                       | ChIP [34]          |
| <i>hsp-4</i>     | ER chaperone, BiP homolog, upregulated with ER stress [8,51,90]                                    | this study         |
| <i>ire-1</i>     | ER signaling factor [90]                                                                           | ChIP [34]          |
| <i>larp-1</i>    | homologous to La protein, stabilizes yeast Hac1( <i>xbp-1</i> ) transcript [71]                    | ChIP [34]          |
| <i>larp-5</i>    | homologous to La protein, stabilizes yeast Hac1 ( <i>xbp-1</i> ) transcript [71]                   | ChIP [34]          |
| <i>lgg-1</i>     | homologous to LC3/Atg8, regulated by ER stress factor ATF4 [72]                                    | ChIP [34]          |
| <i>lgg-3</i>     | homologous to ATG12, regulated by ATF4 during ER stress [73]                                       | ChIP [34]          |
| <i>lin-15B</i>   | negatively regulates G1 progression, ER stress upregulated [51]                                    | ChIP [34]          |
| <i>lpd-2</i>     | regulates <i>lpd</i> genes, modulates ER stress [74,83]                                            | ChIP (operon) [34] |
| <i>memb-2</i>    | Sec22 SNARE protein, ER stress upregulated [8]                                                     | ChIP [34]          |
| <i>pcp-2</i>     | Prolyl Carboxy Peptidase like, IRE-1 dependent [8], up with oxidative stress                       | microarray [21]    |
| <i>pcyt-1</i>    | CCT enzyme for PtdCho synthesis, ER membrane integrity [80,88]                                     | ChIP [34]          |
| <i>pdi-2</i>     | ER Protein disulfide isomerase, upregulated with ER stress [8,51]                                  | ChIP [34]          |
| <i>pdi-3</i>     | ER protein disulfide isomerase [75]                                                                | ChIP [34]          |
| <i>pek-1</i>     | ER signaling factor, kinase [8]                                                                    | ChIP [34]          |
| <i>psd-1</i>     | flow of phospholipid mito to ER, MAM associated [76]                                               | ChIP [34]          |
| <i>R05G6.7</i>   | VDAC, MAM associated [52], not predicted to increase with ER stress [8]                            | ChIP [34]          |
| <i>R12E2.13</i>  | Mannosyltransferase, upregulated with ER stress [8]                                                | ChIP [34]          |
| <i>sca-1</i>     | SERCA, calcium homeostasis, upregulated with ER stress [8]                                         | ChIP [34]          |
| <i>sec-22</i>    | Sec22 SNARE protein, ER stress upregulated [8]                                                     | ChIP [34]          |
| <i>sel-1</i>     | HMG-CoA Reductase, ERAD complex, upregulated with ER stress [8]                                    | ChIP [34]          |

|                  |                                                                                             |                            |
|------------------|---------------------------------------------------------------------------------------------|----------------------------|
| <i>skn-1</i>     | ER stress factor, up with ER stress (this study, [8])                                       | ChIP [34]                  |
| <i>T05E11.3</i>  | HSP90 chaperone [66], up with ER stress (this study)                                        | ChIP [34]                  |
| <i>T14G8.3</i>   | HSP70-like ER resident, ER stress upregulated [51]                                          | ChIP [34]                  |
| <i>tag-320</i>   | cell redox homeostasis, thioredoxin, ER stress upregulated [51]                             | ChIP [34]                  |
| <i>vha-13</i>    | vacuolar proton-translocating ATPase (V-ATPase), regulated by calcineurin/calreticulin [77] | ChIP [34], microarray [21] |
| <i>xbp-1</i>     | ER transcription factor, up with ER stress (this study, [90])                               | ChIP [34]                  |
| <i>Y40B10A.2</i> | O-methyltransferase, ER stress upregulated [51]                                             | ChIP [34]                  |
| <i>Y41C4A.11</i> | Similar to COPI, WD repeat family, ER stress upregulated [8,51]                             | ChIP [34], microarray [21] |
| <i>Y51B9A.9</i>  | putative MAPK9 like kinase (JNK pathway, by homology, Wormbase) [84]                        | microarray [21]            |

#### **Endobiotic and Xenobiotic metabolism, predicted to be ER-localized**

| <b><u>Gene ID</u></b> | <b><u>Function</u></b>                                                                      | <b><u>SKN-1 target study</u></b>    |
|-----------------------|---------------------------------------------------------------------------------------------|-------------------------------------|
| <i>C35D10.10</i>      | putative TMX thioredoxin-like protein, ER Golgi transport, MAM (by homology, Wormbase) [78] | microarray [21]                     |
| <i>C46H11.2</i>       | Flavin-containing monooxygenase, most likely ER localized [55]                              | microarray [21]                     |
| <i>cyp-13A1</i>       | cytochrome p450, most likely ER localized [55]                                              | ChIP [34]                           |
| <i>cyp-13B1</i>       | cytochrome p450, most likely ER localized [55]                                              | microarray [21]                     |
| <i>cyp-14A1</i>       | cytochrome p450, most likely ER localized [55]                                              | microarray [21]                     |
| <i>cyp-25A4</i>       | cytochrome p450, most likely ER localized [55]                                              | ChIP [34]                           |
| <i>cyp-33C4</i>       | cytochrome p450, most likely ER localized [55]                                              | ChIP [34]                           |
| <i>cyp-33C7</i>       | cytochrome p450, most likely ER localized [55]                                              | ChIP [34]                           |
| <i>cyp-33C8</i>       | cytochrome p450, most likely ER localized [55]                                              | ChIP [34]                           |
| <i>cyp-43A1</i>       | cytochrome p450, most likely ER localized [55]                                              | ChIP [34]                           |
| <i>F17A9.4</i>        | potential NADH oxidase, predicted SR localized [85,86]                                      | ChIP [34], microarray [21]          |
| <i>F17A9.5</i>        | potential NADH oxidase, predicted SR localized [85,86]                                      | microarray [21]                     |
| <i>F56D5.3</i>        | potential NADH oxidase, predicted SR localized [85,86]                                      | microarray [21]                     |
| <i>hpo-19</i>         | NADH-cytochrome b-5 reductase, integral to membrane, predicted ER localized [87]            | ChIP (operon) [34], microarray [21] |
| <i>K04A8.10</i>       | UDP-Glucuronosyl Transferase, ER lumen [79]                                                 | microarray [21]                     |

|               |                                                        |                               |
|---------------|--------------------------------------------------------|-------------------------------|
| <i>ugt-1</i>  | UDP-Glucuronosyl Transferase, ER lumen [79]            | microarray [21]               |
| <i>ugt-11</i> | UDP-Glucuronosyl Transferase, ER lumen [79]            | ChIP [34]                     |
| <i>ugt-13</i> | UDP-Glucuronosyl Transferase, ER lumen [79]            | ChIP [34]                     |
| <i>ugt-16</i> | UDP-Glucuronosyl Transferase, ER lumen [79]            | microarray [21]               |
| <i>ugt-20</i> | UDP-Glucuronosyl Transferase, ER lumen [79]            | ChIP [34]                     |
| <i>ugt-22</i> | UDP-Glucuronosyl Transferase, ER lumen [79]            | ChIP [34],<br>microarray [21] |
| <i>ugt-23</i> | UDP-Glucuronosyl Transferase, ER lumen [79]            | microarray [21]               |
| <i>ugt-31</i> | UDP-Glucuronosyl Transferase, ER lumen [79]            | ChIP [34],<br>microarray [21] |
| <i>ugt-46</i> | UDP-Glucuronosyl Transferase, ER lumen [79]            | microarray [21]               |
| <i>ugt-48</i> | UDP-Glucuronosyl Transferase, ER lumen [79]            | microarray [21]               |
| <i>ugt-58</i> | UDP-Glucuronosyl Transferase, ER lumen [79]            | ChIP [34],<br>microarray [21] |
| <i>ugt-64</i> | UDP-Glucuronosyl Transferase, ER lumen [79]            | ChIP [34]                     |
| ZK742.4       | potential NADH oxidase, predicted SR localized [85,86] | ChIP [34],<br>microarray [21] |
