# Supplementary material for: Integration of the Unfolded Protein and Oxidative Stress Responses through SKN-1/Nrf
Source: PubMed Central journal article supplement (PMC3772064; doi:10.1371/journal.pgen.1003701), 2013-09-12
Supplement: pgen.1003701.s009.pdf [file pgen.1003701.s009.pdf]

**Table S2.**

| Strain       | Treatment | Treatment Survival (%) | No. Treatment animals | Control Survival (%) | No of Control Animals | % Survival Change | Assay # |
|--------------|-----------|------------------------|-----------------------|----------------------|-----------------------|-------------------|---------|
| <i>skn-1</i> | -         | 88.5                   | 52                    | 97.1                 | 103                   | -8.6              | 1       |
| <i>skn-1</i> | TM        | 57.4                   | 61                    | 97.1                 | 103                   | -39.7             | 1       |
| <i>skn-1</i> | -         | 100                    | 31                    | 100                  | 78                    | 0                 | 2       |
| <i>skn-1</i> | TM        | 70.7                   | 41                    | 97.5                 | 79                    | -26.8             | 2       |
| <i>skn-1</i> | -         | 85.7                   | 35                    | 92.7                 | 41                    | -7.0              | 3       |
| <i>skn-1</i> | TM        | 21.4                   | 14                    | 74.2                 | 31                    | -52.8             | 3       |
| <i>skn-1</i> | -         | 97.4                   | 39                    | 100                  | 75                    | -2.6              | 4       |
| <i>skn-1</i> | TM        | 51.2                   | 43                    | 93.8                 | 65                    | -42.6             | 4       |
| <i>skn-1</i> | -         | 100                    | 50                    | 100                  | 48                    | 0.0               | 4       |
| <i>skn-1</i> | TM        | 49.4                   | 79                    | 97.4                 | 38                    | -48               | 4       |
