# Supplementary material for: Integration of the Unfolded Protein and Oxidative Stress Responses through SKN-1/Nrf
Source: PubMed Central journal article supplement (PMC3772064; doi:10.1371/journal.pgen.1003701), 2013-09-12
Supplement: pgen.1003701.s010.pdf [file pgen.1003701.s010.pdf]

**Table S3.**

| RNAi         | Treatment | Treatment Survival (%) | No. Treatment animals | Control Survival (%) | No of Control Animals | % Survival Change | Assay # |
|--------------|-----------|------------------------|-----------------------|----------------------|-----------------------|-------------------|---------|
| <i>skn-1</i> | DTT       | 60.6                   | 33                    | 76.9                 | 52                    | -16.3             | 5       |
| <i>hsp-4</i> | DTT       | 42.9                   | 7(30)                 | 76.9                 | 52                    | -34.0             | 5       |
| <i>skn-1</i> | DTT       | 47.7                   | 86                    | 74.1                 | 81                    | -26.4             | 6       |
| <i>hsp-4</i> | DTT       | 68.8                   | 16(20)                | 74.1                 | 81                    | -5.3              | 6       |
