# Supplementary material for: Integration of the Unfolded Protein and Oxidative Stress Responses through SKN-1/Nrf
Source: PubMed Central journal article supplement (PMC3772064; doi:10.1371/journal.pgen.1003701), 2013-09-12
Supplement: pgen.1003701.s011.pdf [file pgen.1003701.s011.pdf]

**Table S4.**

| <b>Strain</b>            | <b>RNAi</b>  | <b>Treatment Timepoint</b> | <b>Treatment Survival (%)</b> | <b>No. Treatment animals</b> | <b>Control Survival (%)</b> | <b>No of Control Animals</b> | <b>% Survival Change</b> | <b>Assay #</b> |
|--------------------------|--------------|----------------------------|-------------------------------|------------------------------|-----------------------------|------------------------------|--------------------------|----------------|
| <i>SJ30 ire-1 (zcl4)</i> | <i>hsp-4</i> | AS, 5mM, 36 hr             | 0                             | 20                           | 82.5                        | 75                           | -82.5                    | 7              |
| <i>SJ30 ire-1 (zcl4)</i> | <i>hsp-4</i> | AS, 5mM, 36 hr             | 0                             | 37                           | 82.5                        | 75                           | -82.5                    | 7              |
| <i>SJ17 xbp-1 (zcl2)</i> | <i>ire-1</i> | AS, 5mM, 36 hr             | 0                             | 49                           | 82.5                        | 75                           | -82.5                    | 7              |
| <i>SJ17 xbp-1 (zcl2)</i> | <i>ire-1</i> | AS, 5mM, 36 hr             | 0                             | 51                           | 82.5                        | 75                           | -82.5                    | 7              |
| <i>SJ30 ire-1 (zcl4)</i> | <i>xbp-1</i> | AS, 5mM, 36 hr             | 61.3                          | 53                           | 82.5                        | 75                           | -21.2                    | 7              |
| <i>SJ30 ire-1 (zcl4)</i> | <i>xbp-1</i> | AS, 5mM, 36 hr             | 67.8                          | 47                           | 82.5                        | 75                           | -14.7                    | 7              |
| <i>SJ30 ire-1 (zcl4)</i> | <i>hsp-4</i> | AS, 5mM, 36 hr             | 0                             | 36                           | 69.5                        | 59                           | -69.5                    | 8              |
| <i>SJ30 ire-1 (zcl4)</i> | <i>hsp-4</i> | AS, 5mM, 36 hr             | 0                             | 36                           | 69.5                        | 59                           | -69.5                    | 8              |
| <i>SJ30 ire-1 (zcl4)</i> | <i>xbp-1</i> | AS, 5mM, 36 hr             | 0                             | 19                           | 69.5                        | 59                           | -69.5                    | 8              |
| <i>SJ30 ire-1 (zcl4)</i> | <i>xbp-1</i> | AS, 5mM, 36 hr             | 0                             | 16                           | 69.5                        | 59                           | -69.5                    | 8              |
| <i>SJ17 xbp-1 (zcl2)</i> | <i>ire-1</i> | AS, 5mM, 36 hr             | 0                             | 17                           | 69.5                        | 59                           | -69.5                    | 8              |
| <i>SJ17 xbp-1 (zcl2)</i> | <i>ire-1</i> | AS, 5mM, 36 hr             | 0                             | 18                           | 69.5                        | 59                           | -69.5                    | 8              |

|                                            |              |                           |      |     |      |     |       |    |
|--------------------------------------------|--------------|---------------------------|------|-----|------|-----|-------|----|
| VC1099<br><i>hsp-4</i><br>( <i>gk514</i> ) | <i>hsp-4</i> | AS, 5mM,<br>36 hr         | 0    | 22  | 69.5 | 59  | -69.5 | 8  |
| VC1099<br><i>hsp-4</i><br>( <i>gk514</i> ) | <i>hsp-4</i> | AS, 5mM,<br>36 hr         | 0    | 27  | 69.5 | 59  | -69.5 | 8  |
|                                            | <i>hsp-4</i> | Para,<br>20mM,<br>10 days | 14.5 | 55  | 33.8 | 343 | -19.3 | 9  |
|                                            | <i>hsp-4</i> | Para,<br>20mM,<br>10 days | 7    | 100 | 33.8 | 343 | -26.8 | 9  |
|                                            | <i>hsp-4</i> | Para,<br>20mM,<br>10 days | 18.5 | 54  | 33.8 | 343 | -15.3 | 9  |
|                                            | <i>xbp-1</i> | Para,<br>20mM,<br>10 days | 14.3 | 28  | 33.8 | 343 | -19.5 | 9  |
|                                            | <i>xbp-1</i> | Para,<br>20mM,<br>10 days | 13.9 | 36  | 33.8 | 343 | -19.9 | 9  |
|                                            | <i>xbp-1</i> | Para,<br>20mM,<br>10 days | 25   | 32  | 33.8 | 343 | -8.8  | 9  |
|                                            | <i>xbp-1</i> | tBOOH,<br>10mM, 10<br>hr  | 55.6 | 9   | 83.7 | 59  | -21.2 | 10 |
|                                            | <i>xbp-1</i> | tBOOH,<br>10mM, 10<br>hr  | 66.7 | 30  | 83.7 | 59  | -12.3 | 10 |
|                                            | <i>hsp-4</i> | tBOOH,<br>10mM, 10<br>hr  | 33.3 | 21  | 83.7 | 59  | -33.7 | 10 |
|                                            | <i>hsp-4</i> | tBOOH,<br>10mM, 10<br>hr  | 48.1 | 27  | 83.7 | 59  | -21.8 | 10 |
